# Supplementary material for: eDNA captures depth partitioning in a kelp forest ecosystem
Source: PLoS One. 2021 Nov 4;16(11):e0253104. doi: 10.1371/journal.pone.0253104 (PMC8568143; doi:10.1371/journal.pone.0253104)
Supplement: S7 Table — Table includes p-values for the Day:Station interaction of the ANOVA for the linear model of eDNA index abundance. (XLSX) [file pone.0253104.s013.xlsx]

## Sheet: S7_Table
Species	Common_names	Surfzone	Habitat	Behavior	Migratory_Transitory	Varied	adjustedp_value(day:depth)	Dist_Match_Behavior
Brachyistius frenatus	Kelp perch	No	rocky reef	Moving within nearshore, form schools	No	No	0.3887	Yes
Cymatogaster aggregata	Shiner perch	Yes	sandy bottom	forms schools and move during day	Yes	Yes	0.01545	Yes
Embiotoca jacksoni	Black perch	Yes	rocky reef	Moving within nearshore, form schools	No	No	0.7348	Yes
Hypsurus caryi	Rainbow seaperch	No	rocky reef	Moving within nearshore, form schools	No	No	0.8588	Yes
Micrometrus minimus	Dwarf perch	Yes	sandy bottom	Moving within nearshore, form schools	No	No	0.705978	Yes
Rhacochilus toxotes	Rubberlip seaperch	Yes	rocky reef	Moving within nearshore, form schools	No	No	0.5468	Yes
Rhacochilus vacca	Pile perch	Yes	rocky reef	Moving within nearshore, form schools	No	No	0.57935	Yes
Chromis punctipinnis	Blacksmith	No	rocky reef	Moving within nearshore, form schools	Yes	No	0.1025	No
Caulolatilus princeps	Ocean whitefish	No	sandy bottom/rocky reef	diurnal foraging over sandy bottom and rocky reefs	Yes	No	0.37589	No
Hypsypops rubicundus	Garibaldi damselfish	No	rocky reef	largely stationary and stay near algal patch	No	No	0.6172	Yes
Cheilotrema saturnum	Black croaker	Yes	sandy bottom	Sandy surf; not migratory/transitory	No	No	0.11173	Yes
Menticirrhus undulatus	California kingcroaker	Yes	sandy bottom	Sandy surf; not migratory/transitory	No	No	0.364403	Yes
Seriphus politus	Queen croaker	Yes	sandy bottom	Forms schools and moves at night	Yes	Yes	3.964e-06	Yes
Umbrina roncador	Yellowfin drum	Yes	sandy bottom	Annually migratory/transitory?	Yes	Yes	3.435e-07	Yes
Sphyraena argentea	Pacific barracuda	Yes	pelagic	migrate anually	Yes	No	0.8163	No
Atherinops affinis	Topsmelt silverside	Yes	pelagic	Form schools; transitory	Yes	Yes	0.04792	Yes
Leuresthes tenuis	California grunion	Yes	pelagic	Nearshore surface dwelling and beach spawners	No	Yes	1.539e-07	No
Synodus lucioceps	California lizardfish	No	sandy bottom/rocky reef	largely stationary, ambush predator	No	No	0.109675	Yes
Strongylura exilis	Californian needlefish	Yes	pelagic	pelagic neritic, travel to feed	Yes	No	0.4026	No
Hypsoblennius gilberti	Rockpool blenny	No	rocky reef	largely stationary	No	No	0.35117	Yes
Hypsoblennius jenkinsi	Mussel blenny	No	rocky reef	largely stationary	No	No	0.5187	Yes
Gibbonsia montereyensis	Crevice kelpfish	No	rocky reef	largely stationary	No	No	0.7471	Yes
Heterostichus rostratus	Giant kelpfish	Yes	rocky reef	largely stationary	No	Yes	0.0003906	No
Rimicola muscarum	Kelp clingfish	No	rocky reef	largely stationary	No	No	0.11571	Yes
Paraclinus integripinnis	Reef finspot	No	rocky reef	largely stationary	No	No	0.323	Yes
Trachurus symmetricus	Pacific jack mackerel	Yes	pelagic	pelagic neritic, travel to feed	Yes	No	0.34126	No
Girella nigricans	Opaleye	Yes	rocky reef	Moving within nearshore, form schools	No	Yes	0.006144	No
Hermosilla azurea	Zebra perch sea-chub	No	rocky reef	Moving within nearshore, form schools	No	Yes	< 2.2e-16	No
Medialuna californiensis	Halfmoon	No	rocky reef	Moving within nearshore, form schools	No	No	0.7527	Yes
Sardinops sagax	Pacific sardine	Yes	pelagic	Migratory; in Southern California in autumn	Yes	Yes	0.001644	Yes
Engraulis mordax	Californian anchovy	Yes	pelagic	Migratory/transitory	Yes	Yes	4.922e-06	Yes
Lethops connectens	Halfblind goby	No	rocky reef	largely stationary	No	No	0.006412	No
Typhlogobius californiensis	Blind goby	Yes	sandy bottom/rocky reef	largely stationary	No	No	0.6833	Yes
Halichoeres semicinctus	Rock wrasse	No	sandy bottom/rocky reef	Moving within nearshore, form schools	No	No	0.1836	Yes
Oxyjulis californica	Señorita	No	rocky reef	Moving within nearshore, form schools	Yes	No	0.13924	No
Semicossyphus pulcher	California sheephead	No	rocky reef	Have home ranges and diel movement	No	No	0.16477	Yes
Anisotremus davidsonii	Xantic sargo	Yes	rocky reef	Moving within nearshore, form schools	No	No	0.5054	Yes
Mugil cephalus	Flathead grey mullet	Yes	sandy bottom	Moving within nearshore, form schools	Yes	No	0.634846	No
Ophidion scrippsae	Basketweave cusk-eel	No	sandy bottom	largely stationary	No	No	0.3993	Yes
Clinocottus analis	Woolly sculpin	No	rocky reef	largely stationary	No	No	0.5698	Yes
Clinocottus recalvus	Bald sculpin	No	rocky reef	largely stationary	No	No	0.20934	Yes
Ruscarius creaseri	Roughcheek sculpin	No	rocky reef	largely stationary	No	No	0.12297	Yes
Scorpaenichthys marmoratus	Cabezon	No	sandy bottom/rocky reef	largely stationary	No	No	0.1661	Yes
Oxylebius pictus	Painted greenling	No	rocky reef	largely stationary	No	No	0.6309	Yes
Scorpaena guttata	California scorpionfish	No	rocky reef	largely stationary	No	No	0.27	Yes
Paralabrax clathratus	Kelp bass	Yes	rocky reef	Stays close to kelp	No	Yes	0.000101	No
Paralabrax nebulifer	Barred sand bass	Yes	rocky reef	Stay close to site during non-spawning times (we sampled in non-spawning times)	No	Yes	0.0005826	No
Symphurus atricaudus	California tonguefish	No	sandy bottom	Sandy bottom	No	No	0.40342	Yes
Citharichthys sordidus	Pacific sanddab	Yes	sandy bottom	Sandy bottom	No	No	0.369557	Yes
Citharichthys stigmaeus	Speckled sanddab	Yes	sandy bottom	Sandy bottom	No	Yes	0.001263	No
Paralichthys californicus	California flounder	Yes	sandy bottom	Sandy bottom	No	No	0.2349	Yes
Pleuronichthys verticalis	Hornyhead turbot	No	sandy bottom	Sandy bottom	No	No	0.322	Yes
Sarda chiliensis	Eastern pacific bonito	No	pelagic	Migratory/transitory	Yes	Yes	0.02054	Yes
Scomber japonicus	Chub mackerel	Yes	pelagic	Migratory/transitory	Yes	No	0.13833	No
Syngnathus leptorhynchus	Bay pipefish	No	rocky reef	largely stationary	No	No	0.8585	Yes
Platyrhinoidis triseriata	Thornback guitarfish	Yes	sandy bottom	largely stationary	No	No	0.1214	Yes
Squatina californica	Pacific angelshark	No	sandy bottom	Sluggish, inactive species	No	Yes	1.769e-05	No
Mustelus californicus	Gray smoothhound	Yes	sandy bottom/rocky reef	forage for prey	Yes	Yes	0.01372	Yes
Triakis semifasciata	Leopard shark	Yes	sandy bottom/rocky reef	forage for prey	No	Yes	0.050394	Yes
Heterodontus francisci	Horn shark	No	sandy bottom/rocky reef	largely stationary	No	Yes	0.03042	No
Gymnura marmorata	California butterfly ray	Yes	sandy bottom	largely stationary	No	No	0.1292	Yes
Myliobatis californica	Bat eagle ray	Yes	sandy bottom	largely stationary	No	No	0.08772	Yes
Pseudobatos productus	Shovelnose guitarfish	Yes	sandy bottom	largely stationary	No	No	0.358593	Yes
Tursiops truncatus	Bottlenose dolphin	No	pelagic	forage for prey	Yes	Yes	3.066e-08	Yes
Zalophus californianus	California sea lion	No	pelagic	forage for prey	Yes	No	0.6319	No
Family Embiotocidae*	surfperch	Yes	sandy bottom	Wide range, transitory	Yes	Yes	3.792e-05	Yes
Genus Gibbonsia*	clinids	Yes	rocky reef	Stays close to kelp	No	Yes	0.007932	No
